# Supplementary material for: Thermoelectric properties of zinc-doped Cu5Sn2Se7 and Cu5Sn2Te7
Source: Royal Society of Chemistry journal article supplement (doi:10.1039/d1dt00615k), 2021-01-01
Supplement: d1dt00615k1.pdf [file d1dt00615k1.pdf]

## Thermoelectric Properties of Zinc-Doped $\text{Cu}_5\text{Sn}_2\text{Se}_7$ and $\text{Cu}_5\text{Sn}_2\text{Te}_7$

Cheryl Sturm,<sup>a</sup> Leilane R. Macario,<sup>a</sup> Takao Mori,<sup>b</sup> and Holger Kleinke<sup>\*a</sup>

### SUPPLEMENTARY INFORMATION

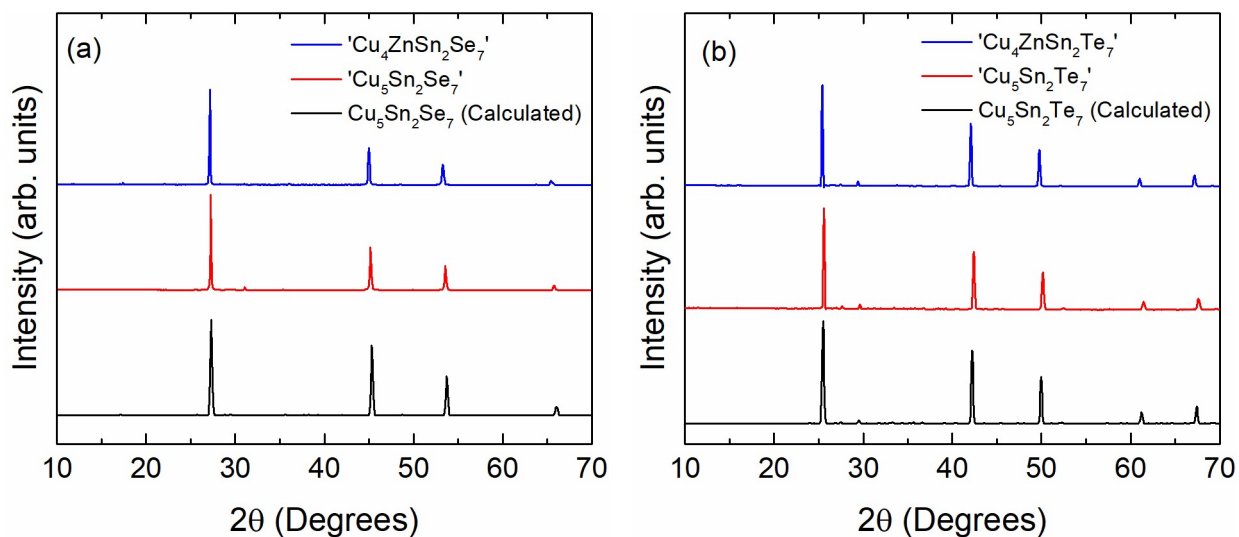

Figure S1. Calculated and experimental X-ray powder patterns of (a) 'Cu<sub>5</sub>Sn<sub>2</sub>Se<sub>7</sub>' and 'Cu<sub>4</sub>ZnSn<sub>2</sub>Se<sub>7</sub>', and (b) 'Cu<sub>5</sub>Sn<sub>2</sub>Te<sub>7</sub>' and 'Cu<sub>4</sub>ZnSn<sub>2</sub>Te<sub>7</sub>'.

Table S1. Refined lattice parameters of  $\text{Cu}_{5-x}\text{Zn}_x\text{Sn}_2\text{Q}_7$ .

|                            | 'Cu <sub>5</sub> Sn <sub>2</sub> Se <sub>7</sub> ' | 'Cu <sub>4</sub> ZnSn <sub>2</sub> Se <sub>7</sub> ' | 'Cu <sub>5</sub> Sn <sub>2</sub> Te <sub>7</sub> ' | 'Cu <sub>4</sub> ZnSn <sub>2</sub> Te <sub>7</sub> ' |
|----------------------------|----------------------------------------------------|------------------------------------------------------|----------------------------------------------------|------------------------------------------------------|
| <i>a</i> (Å)               | 12.5580(8)                                         | 12.6067(5)                                           | 13.544(1)                                          | 13.5925(2)                                           |
| <i>b</i> (Å)               | 5.6570(2)                                          | 5.6771(1)                                            | 6.0442(2)                                          | 6.0696(2)                                            |
| <i>c</i> (Å)               | 8.9991(5)                                          | 8.9270(6)                                            | 9.5771(3)                                          | 9.4935(2)                                            |
| <i>β</i> (°)               | 98.170(5)                                          | 98.135(3)                                            | 98.063(3)                                          | 98.302(2)                                            |
| <i>V</i> (Å <sup>3</sup> ) | 632.81(7)                                          | 632.47(5)                                            | 776.26(5)                                          | 775.02(3)                                            |

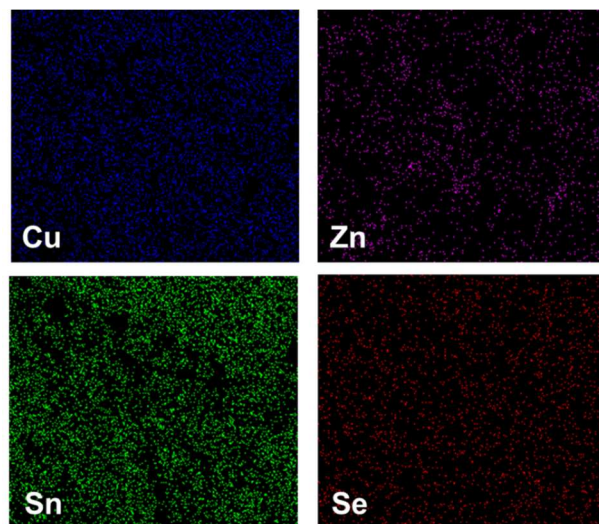

Figure S2. EDX maps of 'Cu<sub>4</sub>ZnSn<sub>2</sub>Se<sub>7</sub>'.

Table S2. Results of EDX confirming homogeneity of 'Cu<sub>4</sub>ZnSn<sub>2</sub>Se<sub>7</sub>' (STDEV = standard deviation, using eight data points).

| <b>Element</b> | <b>theor. at.-%</b> | <b>exper. at.-%</b> | <b>STDEV</b> |
|----------------|---------------------|---------------------|--------------|
| Cu (K)         | 28.6                | 29.4                | 1.2          |
| Zn (K)         | 7.1                 | 6.8                 | 1.1          |
| Sn (L)         | 14.3                | 14.7                | 0.3          |
| Se (L)         | 50.0                | 49.1                | 1.9          |

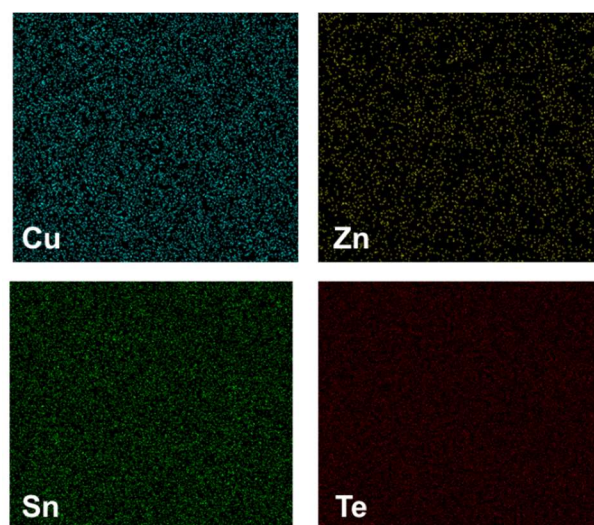

Figure S3. EDX maps of  $\text{Cu}_4\text{ZnSn}_2\text{Te}_7$ .

Table S3. Results of EDX confirming homogeneity of sample ' $\text{Cu}_4\text{ZnSn}_2\text{Te}_7$ ' (STDEV = standard deviation, using eight data points).

| <b>Element</b> | <b>theor. at.-%</b> | <b>exper. at.-%</b> | <b>STDEV</b> |
|----------------|---------------------|---------------------|--------------|
| Cu (K)         | 28.6                | 28.0                | 1.8          |
| Zn (K)         | 7.1                 | 7.3                 | 0.8          |
| Sn (L)         | 14.3                | 14.7                | 1.1          |
| Te (L)         | 50.0                | 50.0                | 1.3          |

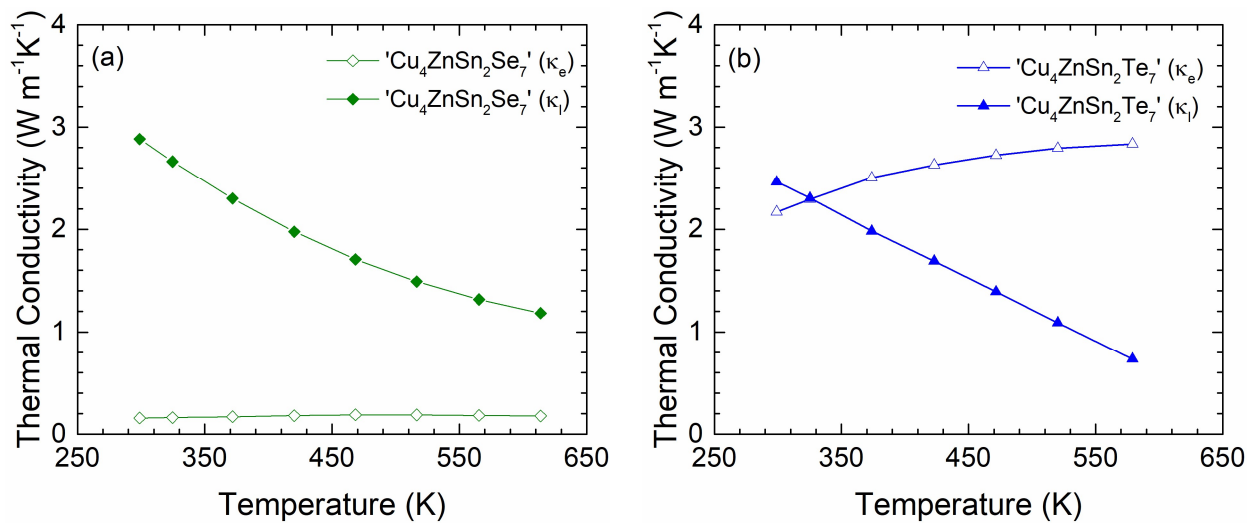

Figure S4. Temperature dependence of the electrical and lattice components of the thermal conductivity of (a) 'Cu<sub>4</sub>ZnSn<sub>2</sub>Se<sub>7</sub>' and (b) 'Cu<sub>4</sub>ZnSn<sub>2</sub>Te<sub>7</sub>'.
